# Supplementary material for: Differential Regulation of MicroRNAs in End-Stage Failing Hearts Is Associated with Left Ventricular Assist Device Unloading
Source: Hindawi journal article supplement (doi:10.1155/2015/592512), 2015-01-01
Supplement: f1 [file 592512.f1.pdf]

## Supplemental Material

**Supplemental Table 1.** List of the most enriched KEGG pathways according to *in silico* analysis of predicted targets of miRNAs associated with clinical parameters in failing heart with/without LVAD support.

| KEGG pathway                        | p value  | n°<br>miRNAs | n° target<br>genes (% in<br>the pathway) | candidate target genes                                                                                                                                                                                                   |
|-------------------------------------|----------|--------------|------------------------------------------|--------------------------------------------------------------------------------------------------------------------------------------------------------------------------------------------------------------------------|
|                                     |          |              |                                          | FZD7; WNT16; FZD5; TGFBR1; APC; CRK;<br>WNT5A; HHIP; COL4A5; PIK3R5; ETS1;<br>RALA; WNT3; IGF1R; FGF20; WNT5B;<br>CDK6; MST1; EPAS1; MITF; PTK2; CBLB;                                                                   |
| Pathways in cancer                  | 2.95E-09 | 9            | 49 (15.0%)                               | ITGAV; CDH1; FZD10; PDGFB; KIT; VEGFC;<br>COL4A3; PIK3R1; COL4A4; FGF9; KITLG;<br>RAC1; FGF18; BMP2; MAX; LAMC1; IGF1;<br>CASP8; LEF1; COL4A6; LAMA2; STAT1;<br>PTEN; FOXO1; TGFBR2; TFG; COL4A1                         |
| Regulation of actin<br>cytoskeleton | 1.44E-04 | 9            | 29 (13.5%)                               | WASL; ITGB8; APC; CRK; MYL12B; PIK3R5;<br>ROCK2; MYH10; GNG12; TMSB4Y; MYLK2;<br>FGF20; ITGA1; RRAS2; PTK2; ITGAV;<br>PIKFYVE; NCKAP1L; PDGFB; CFL2;<br>PIK3R1; FGF9; RAC1; FGF18; MYL7; PDGFC;<br>MYLK3; NCKAP1; DIAPH2 |
| Focal adhesion                      | 1.37E-16 | 8            | 40 (19.3%)                               | ITGB8; CRK; THBS1; MYL12B; COL4A5;<br>PIK3R5; RAP1A; COL27A1; ROCK2; IGF1R;<br>MYLK2; CAV2; ITGA1; COL3A1; PTK2;<br>ITGAV; COL2A1; COL5A1; PDGFB;<br>COL1A1; VEGFC; COL4A3; PIK3R1;                                      |

|                                         |          |   |            |                                                                                                                                                                                                                                                                                                                                                                                                     |
|-----------------------------------------|----------|---|------------|-----------------------------------------------------------------------------------------------------------------------------------------------------------------------------------------------------------------------------------------------------------------------------------------------------------------------------------------------------------------------------------------------------|
|                                         |          |   |            | COL4A4; RAC1; MYL7; COL1A2; LAMC1;<br>IGF1; PDGFC; MYLK3; COL11A1; COL6A3;<br>COL4A6; LAMA2; COL5A3; PTEN; COL5A2;<br>ARHGAP5; COL4A1                                                                                                                                                                                                                                                               |
| PI3K-Akt signaling pathway              | 1.15E-11 | 8 | 50 (14.4%) | PRLR; ITGB8; THBS1; CREB5; COL4A5;<br>PIK3R5; COL27A1; GNG12; STK11; IGF1R;<br>FGF20; PPP2R5C; ITGA1; CDK6; COL3A1;<br>IL7R; EFNA5; GHR; PTK2; ITGAV; COL2A1;<br>TSC2; JAK2; EIF4E; COL5A1; PDGFB;<br>COL1A1; KIT; VEGFC; COL4A3; PIK3R1;<br>COL4A4; FGF9; KITLG; RAC1; FGF18;<br>COL1A2; LAMC1; IGF1; PDGFC; COL11A1;<br>COL6A3; COL4A6; FOXO3; LAMA2;<br>COL5A3; PTEN; COL5A2; RPS6KB1;<br>COL4A1 |
| Transcriptional misregulation in cancer | 4.27E-07 | 8 | 30 (16.8%) | CCNT2; WNT16; LMO2; ELK4; HMGA2;<br>AFF1; MLLT3; IGF1R; PRCC; UTY; PTK2;<br>ATM; CEBPB; MLF1; NR4A3; KLF3; BMP2K;<br>PDGFB; JMJD1C; ETV1; CDK14; MAX;<br>DOT1L; IGF1; MYCN; MEF2C; SIX4; FOXO1;<br>SMAD1; TGFBR2                                                                                                                                                                                    |
| mTOR signaling pathway                  | 9.89E-06 | 8 | 13 (21.7%) | PIK3R5; STK11; RPS6KA1; RICTOR;<br>AKT1S1; TSC2; EIF4E; VEGFC; PIK3R1;<br>IGF1; PTEN; ULK2; RPS6KB1                                                                                                                                                                                                                                                                                                 |
| Axon guidance                           | 4.22E-05 | 8 | 20 (15.7%) | SEMA5A; EPHA5; ROCK2; NTN1; SEMA4F;<br>EFNA5; NCK1; PTK2; RASA1; UNC5A;<br>NFAT5; SRGAP3; NCK2; DPYSL5; CFL2;                                                                                                                                                                                                                                                                                       |

|                                                 |          |   |            |                                                                                                                                                                           |
|-------------------------------------------------|----------|---|------------|---------------------------------------------------------------------------------------------------------------------------------------------------------------------------|
|                                                 |          |   |            | SEMA3D; RAC1; ROBO1; SEMA6D; GNAI1                                                                                                                                        |
| Dilated cardiomyopathy                          | 5.46E-05 | 8 | 15 (16.7%) | DES; ITGB8; TPM1; ADCY2; CACNB4; SGCD; ITGA1; ITGAV; DMD; PLN; SLC8A1; IGF1; LAMA2; CACNA2D1; ATP2A2                                                                      |
| Wnt signaling pathway                           | 6.04E-05 | 8 | 20 (14.4%) | FZD7; WNT16; FZD5; LRP6; TBL1X; BTRC; APC; WNT5A; PORCN; ROCK2; WNT3; PPP2R5C; WNT5B; CAMK2A; NFAT5; GPC4; FZD10; RAC1; SIAH1; LEF1                                       |
| Hypertrophic cardiomyopathy (HCM)               | 7.65E-05 | 8 | 14 (16.9%) | DES; ITGB8; TPM1; CACNB4; SGCD; ITGA1; ITGAV; DMD; SLC8A1; PRKAB2; IGF1; LAMA2; CACNA2D1; ATP2A2                                                                          |
| Arrhythmogenic right ventricular cardiomyopathy | 1.77E-03 | 8 | 13 (17.6%) | DES; ITGB8; CACNB4; SGCD; ITGA1; ITGAV; DMD; SLC8A1; DSG2; LEF1; LAMA2; CACNA2D1; ATP2A2                                                                                  |
| Endocytosis                                     | 7.59E-03 | 8 | 23 (11.3%) | TGFBR1; SMAD6; STAM; IQSEC3; WWP1; PDCD6IP; AP2B1; SMURF2; CHMP1B; IGF1R; CAV2; CBLB; PSD3; RAB11FIP2; RAB11A; KIT; RAB11FIP5; HGS; HSPA8; VPS37C; TGFBR2; PIP5KL1; ASAP2 |
| Leukocyte transendothelial migration            | 1.05E-02 | 8 | 15 (12.7%) | CTNND1; CLDN8; MYL12B; PIK3R5; RAP1A; ROCK2; CLDN16; PTK2; PIK3R1; RAC1; MYL7; CLDN1; CDH5; ARHGAP5; GNAI1                                                                |
| Neurotrophin signaling pathway                  | 2.10E-02 | 8 | 15 (12.5%) | NTF3; CAMK4; CALM3; CRK; PIK3R5; RAP1A; NTRK3; RPS6KA1; CAMK2A; KIDINS220; PIK3R1; RAC1; GAB1; FOXO3; IRAK1                                                               |

|                                        |          |   |            |                                                                                                                                                                                                                                                                                              |
|----------------------------------------|----------|---|------------|----------------------------------------------------------------------------------------------------------------------------------------------------------------------------------------------------------------------------------------------------------------------------------------------|
| Salivary secretion                     | 3.61E-02 | 8 | 11 (12.2%) | ADCY2; CALM3; ATP1B1; ATP2B1; ATP1B3;<br>RYR3; GNAQ; GUCY1A2; PRKG1; ATP1A1;<br>ITPR2                                                                                                                                                                                                        |
| ECM-receptor interaction               | 3.21E-53 | 7 | 23 (26.4%) | ITGB8; SV2B; THBS1; COL4A5; COL27A1;<br>ITGA1; COL3A1; ITGAV; COL2A1; COL5A1;<br>COL1A1; COL4A3; COL4A4; COL1A2;<br>LAMC1; COL11A1; COL6A3; COL4A6;<br>LAMA2; COL5A3; COL5A2; CD47; COL4A1                                                                                                   |
| MAPK signaling pathway                 | 1.39E-06 | 7 | 36 (14.0%) | NTF3; CACNA1A; TGFBR1; RASA2; ELK4;<br>CRK; CACNB4; RAP1A; GNG12; MAP4K3;<br>MAP4K4; RPS6KA1; FGF20; TAB2;<br>MAP3K11; RRAS2; MST1; TAOK1;<br>CACNA1I; DUSP10; RASA1; MAP3K12;<br>RASGRP1; PPM1A; PDGFB; FGF9; RAC1;<br>FGF18; HSPA8; NF1; MAX; TNFRSF1A;<br>MAP3K2; CACNA2D1; MEF2C; TGFBR2 |
| Melanoma                               | 1.48E-04 | 7 | 13 (18.3%) | PIK3R5; IGF1R; FGF20; CDK6; MITF; CDH1;<br>PDGFB; PIK3R1; FGF9; FGF18; IGF1;<br>PDGFC; PTEN                                                                                                                                                                                                  |
| Pancreatic secretion                   | 3.25E-03 | 7 | 13 (13.5%) | ADCY2; TRPC1; RAP1A; SLC4A4; ATP1B1;<br>ATP2B1; ATP1B3; RAB11A; RAC1; GNAQ;<br>ATP2A2; ATP1A1; ITPR2                                                                                                                                                                                         |
| mRNA surveillance pathway              | 5.01E-03 | 7 | 12 (13.2%) | MSI2; CPSF7; PAPOLG; PABPC4; PPP2R5C;<br>NXF1; PABPC1L; PABPC4L; SMG1; FIP1L1;<br>ACIN1; GSPT1                                                                                                                                                                                               |
| Cytokine-cytokine receptor interaction | 5.73E-03 | 7 | 24 (9.1%)  | PRLR; TGFBR1; INHBB; CXCL5; TNFRSF1B;<br>IL7R; CCL11; GHR; CCL7; LIFR; PDGFB;                                                                                                                                                                                                                |

|                                        |          |   |            |                                                                                                                                                                                                               |
|----------------------------------------|----------|---|------------|---------------------------------------------------------------------------------------------------------------------------------------------------------------------------------------------------------------|
|                                        |          |   |            | KIT; VEGFC; ACVR2A; KITLG; BMP2;<br>PDGFC; BMPR1A; TNFRSF1A; IL6ST;<br>IL11RA; TNFRSF9; TGFBR2; BMPR2                                                                                                         |
| Gastric acid secretion                 | 7.52E-03 | 7 | 11 (14.7%) | ADCY2; CALM3; ATP1B1; MYLK2;<br>CAMK2A; ATP1B3; GNAQ; MYLK3;<br>ATP1A1; ITPR2; GNAI1                                                                                                                          |
| Bile secretion                         | 7.52E-03 | 7 | 10 (13.9%) | ADCY2; AQP9; SLC4A4; ATP1B1; AQP4;<br>ATP1B3; ABCC3; SLC22A7; ATP1A1;<br>SCARB1                                                                                                                               |
| ErbB signaling pathway                 | 1.19E-02 | 7 | 13 (14.9%) | HBEGF; NRG4; CRK; PIK3R5; CAMK2A;<br>NCK1; PTK2; CBLB; NCK2; PIK3R1; GAB1;<br>ABL2; RPS6KB1                                                                                                                   |
| Ubiquitin mediated proteolysis         | 1.25E-02 | 7 | 17 (12.4%) | BTRC; FBXW7; TRIM37; UBR5; WWP1;<br>SMURF2; UBE4A; RHOBTB1; HERC3;<br>CBLB; CUL5; UBE2A; UBE2Q1; SIAH1;<br>ERCC8; KLHL9; UBE2W                                                                                |
| Bacterial invasion of epithelial cells | 1.41E-02 | 7 | 10 (13.2%) | WASL; CRK; PIK3R5; CAV2; PTK2; CBLB;<br>CDH1; PIK3R1; RAC1; GAB1                                                                                                                                              |
| Viral myocarditis                      | 4.73E-02 | 7 | 9 (15%)    | CXADR; MYH10; SGCD; DMD; RAC1;<br>MYH15; CASP8; LAMA2; ABL2                                                                                                                                                   |
| Protein digestion and absorption       | 1.37E-16 | 6 | 24 (27.0%) | COL4A5; ELN; COL27A1; COL7A1; ATP1B1;<br>COL3A1; COL9A1; COL2A1; COL15A1;<br>ATP1B3; SLC7A7; COL5A1; COL1A1;<br>SLC8A1; COL4A3; COL4A4; COL1A2;<br>COL11A1; COL6A3; COL4A6; ATP1A1;<br>COL5A3; COL5A2; COL4A1 |
| TGF-beta signaling                     | 9.21E-06 | 6 | 16 (20.0%) | TGFBR1; SMAD6; INHBB; THBS1; SMURF2;                                                                                                                                                                          |

|                                                           |          |   |            |                                                                                                                                                                                  |
|-----------------------------------------------------------|----------|---|------------|----------------------------------------------------------------------------------------------------------------------------------------------------------------------------------|
| pathway                                                   |          |   |            | ROCK2; DCN; ACVR2A; BMP2; TFD1;<br>BMPR1A; LTBP1; SMAD1; TGFBR2; BMPR2;<br>RPS6KB1                                                                                               |
| Small cell lung cancer                                    | 2.65E-05 | 6 | 15 (17.4%) | COL4A5; PIK3R5; CDK6; APAF1; PTK2;<br>ITGAV; COL4A3; PIK3R1; COL4A4; MAX;<br>LAMC1; COL4A6; LAMA2; PTEN; COL4A1                                                                  |
| Melanogenesis                                             | 2.15E-04 | 6 | 16 (15.8%) | FZD7; WNT16; FZD5; ADCY2; CALM3;<br>WNT5A; WNT3; WNT5B; MITF; CAMK2A;<br>FZD10; KIT; KITLG; GNAQ; LEF1; GNAI1                                                                    |
| Adherens junction                                         | 4.53E-04 | 6 | 11 (15.1%) | TGFBR1; WASL; CTNND1; SORBS1; IGF1R;<br>CDH1; FER; RAC1; LEF1; PVRL3; TGFBR2                                                                                                     |
| Lysine degradation                                        | 3.25E-03 | 6 | 7 (13.7%)  | SETDB2; SETD2; NSD1; ASH1L; DOT1L;<br>SUV420H2; MLL3                                                                                                                             |
| Endocrine and other factor-regulated calcium reabsorption | 9.63E-03 | 6 | 8 (16.7%)  | AP2B1; ATP1B1; ATP2B1; ATP1B3; RAB11A;<br>SLC8A1; GNAQ; ATP1A1                                                                                                                   |
| RNA degradation                                           | 2.28E-02 | 6 | 10 (13.5%) | CNOT6; CNOT4; SKIV2L2; PABPC4; C1D;<br>PAN2; PABPC1L; PABPC4L; CNOT3; DHX36                                                                                                      |
| Amoebiasis                                                | 8.37E-14 | 5 | 21 (19.3%) | COL4A5; PIK3R5; COL27A1; SERPINB9;<br>COL3A1; PTK2; COL2A1; COL5A1; COL1A1;<br>COL4A3; PIK3R1; COL4A4; COL1A2;<br>LAMC1; GNAQ; COL11A1; COL4A6;<br>LAMA2; COL5A3; COL5A2; COL4A1 |
| Basal cell carcinoma                                      | 1.25E-04 | 5 | 11 (20.0%) | FZD7; WNT16; FZD5; APC; WNT5A; HHIP;<br>WNT3; WNT5B; FZD10; BMP2; LEF1                                                                                                           |

|                                           |          |   |            |                                                                                          |
|-------------------------------------------|----------|---|------------|------------------------------------------------------------------------------------------|
| p53 signaling pathway                     | 2.03E-04 | 5 | 12 (17.6%) | THBS1; CDK6; APAF1; ATM; TSC2; SIAH1; MDM4; IGF1; CASP8; PTEN; CCNG2; PPM1D              |
| Phosphatidylinositol signaling system     | 3.51E-03 | 5 | 12 (14.8%) | CALM3; PIK3R5; PIKFYVE; INPP4A; PIK3R1; DGKB; OCRL; INPP5A; DGKD; PTEN; ITPR2; DGKH      |
| Hedgehog signaling pathway                | 1.13E-02 | 5 | 8 (15.7%)  | WNT16; BTRC; WNT5A; HHIP; WNT3; RAB23; WNT5B; BMP2                                       |
| Aldosterone-regulated sodium reabsorption | 3.47E-02 | 5 | 6 (15.4%)  | PIK3R5; ATP1B1; ATP1B3; PIK3R1; IGF1; ATP1A1                                             |
| Renal cell carcinoma                      | 3.54E-02 | 5 | 10 (15.2%) | CRK; PIK3R5; RAP1A; ETS1; EPAS1; PDGFB; VEGFC; PIK3R1; RAC1; GAB1                        |
| Pancreatic cancer                         | 4.73E-02 | 5 | 9 (13.6%)  | TGFBR1; PIK3R5; RALA; CDK6; VEGFC; PIK3R1; RAC1; STAT1; TGFBR2                           |
| Mineral absorption                        | 4.22E-05 | 4 | 11 (21.6%) | ATP7A; ATP1B1; ATP2B1; ATP1B3; STEAP2; SLC11A2; SLC8A1; ATP1A1; CYBRD1; SLC46A1; SLC30A1 |
